# Supplementary material for: The ParB homologs, Spo0J and Noc, together prevent premature midcell Z ring assembly when the early stages of replication are blocked in Bacillus subtilis
Source: PubMed Central journal article supplement (PMC6852036; doi:10.1111/mmi.14319), 2019-06-11

1 **The ParB homologs, Spo0J and Noc, together prevent premature midcell Z ring**  
2 **assembly when the early stages of replication are blocked in *Bacillus subtilis*.**

3

4

#### SUPPLEMENTARY MATERIALS

5

6

7 Isabella V. Hajduk, Riti Mann, Christopher D. A. Rodrigues, Elizabeth J. Harry

8

9

10

11 <sup>1</sup>The ithree institute, University of Technology Sydney, PO Box 123 Broadway NSW 2007  
12 Australia

13

14

15 **Running title:** ParB homologs block premature midcell Z ring assembly

16

17

18

19

20 For correspondence:

21

22 [Elizabeth.Harry@uts.edu.au](mailto:Elizabeth.Harry@uts.edu.au)

23

24

25

26

27

28 The ithree institute

29 Faculty of Science

30 University of Technology Sydney

31 T. +61 (02) 9514 4173

32 M. +61 (0) 404 643 181

33 PO Box 123 Broadway NSW 2007 Australia

34

1 **Table S1: *Bacillus subtilis* strain list used in this study**

| Strain | Genotype                                                                                                                                                                                | Source                          |
|--------|-----------------------------------------------------------------------------------------------------------------------------------------------------------------------------------------|---------------------------------|
| SU5    | 168 <i>trpC2</i>                                                                                                                                                                        | E. Nester                       |
| SU492  | 168 <i>trpC2 amyE::(spc P<sub>xyl</sub>-ftsZ-yfp)</i>                                                                                                                                   | Lab stock                       |
| SU504  | 168 <i>trpC2 amyE::Pspachy-ftsZ (cat)</i>                                                                                                                                               | Rodrigues & Harry, 2012         |
| SU533  | 168 <i>trpC2 Δnoc::cat</i>                                                                                                                                                              | Lab stock                       |
| SU629  | 168 <i>trpC2 Δnoc::tet amyE::(spc P<sub>xyl</sub>-noc-yfp)</i>                                                                                                                          | Lab stock                       |
| SU656  | 168 <i>trpC2 Δnoc::tet</i>                                                                                                                                                              | Lab stock                       |
| SU661  | 168 <i>trpC2<sup>+</sup> dna-1</i>                                                                                                                                                      | Rodrigues & Harry, 2012         |
| SU682  | 168 <i>trpC2 amyE::(spc P<sub>xyl</sub>-ftsZ-yfp) ΔminCD::cat</i>                                                                                                                       | Lab stock                       |
| SU746  | 168 <i>trpC2<sup>+</sup> dna-1 amyE::(spc P<sub>xyl</sub>-ftsZ-yfp)</i>                                                                                                                 | This work                       |
| SU747  | <i>trpC2 Δsoj::neo</i>                                                                                                                                                                  | Scholefield <i>et al</i> , 2011 |
| SU748  | <i>trpC2 Δspo0J::neo, amyE::spo0J (cat)</i>                                                                                                                                             | Gruber & Errington, 2009        |
| SU765  | 168 <i>trpC2 Δsoj-spo0J::tet</i>                                                                                                                                                        | This work                       |
| SU766  | 168 <i>trpC2<sup>+</sup> dna-1 Δsoj-spo0J::tet</i>                                                                                                                                      | This work                       |
| SU767  | 168 <i>trpC2 amyE::(spc P<sub>xyl</sub>-ftsZ-yfp) Δsoj-spo0J::tet</i>                                                                                                                   | This work                       |
| SU768  | 168 <i>trpC2<sup>+</sup> dna-1 amyE::(spc P<sub>xyl</sub>-ftsZ-yfp) Δsoj-spo0J::tet</i>                                                                                                 | This work                       |
| SU769  | 168 <i>trpC2 Δspo0J::kan</i>                                                                                                                                                            | This work                       |
| SU770  | 168 <i>trpC2<sup>+</sup> dna-1 Δspo0J::kan</i>                                                                                                                                          | This work                       |
| SU771  | 168 <i>trpC2 Δsoj::kan</i>                                                                                                                                                              | This work                       |
| SU772  | 168 <i>trpC2<sup>+</sup> dna-1 Δsoj::kan</i>                                                                                                                                            | This work                       |
| SU802  | 168 <i>trpC2<sup>+</sup> dna-1 Δnoc::cat</i>                                                                                                                                            | This work                       |
| SU803  | 168 <i>trpC2 Δnoc::cat Δsoj-spo0J::tet</i>                                                                                                                                              | This work                       |
| SU804  | 168 <i>trpC2<sup>+</sup> dna-1 Δnoc::cat Δsoj-spo0J::tet</i>                                                                                                                            | This work                       |
| SU823  | 168 <i>trpC2 Δsoj-spo0J::tet hutM(345°)::lacO(cat), thrC (283°)::lacI-cfp(erm) amyE::(spc P<sub>xyl</sub>-ftsZ-yfp)</i>                                                                 | This work                       |
| SU824  | 168 <i>trpC2<sup>+</sup> dna-1 Δsoj-spo0J::tet hutM(345°)::lacO(cat), thrC (283°)::lacI-cfp(erm) amyE::(spc P<sub>xyl</sub>-ftsZ-yfp)</i>                                               | This work                       |
| SU827  | 168 <i>trpC2 Δnoc::cat Δsoj::kan</i>                                                                                                                                                    | This work                       |
| SU828  | 168 <i>trpC2<sup>+</sup> dna-1 Δnoc::cat Δsoj::kan</i>                                                                                                                                  | This work                       |
| SU829  | 168 <i>trpC2 Δnoc::cat Δspo0J::kan</i>                                                                                                                                                  | This work                       |
| SU830  | 168 <i>trpC2<sup>+</sup> dna-1 Δnoc::cat Δspo0J::kan</i>                                                                                                                                | This work                       |
| SU831  | 168 <i>trpC2 Δnoc::cat amyE::(spc P<sub>xyl</sub>-noc-yfp)</i>                                                                                                                          | This work                       |
| SU832  | 168 <i>trpC2<sup>+</sup> dna-1 Δnoc::cat amyE::(spc P<sub>xyl</sub>-noc-yfp)</i>                                                                                                        | This work                       |
| SU833  | 168 <i>trpC2 Δnoc::cat Δspo0J::kan amyE::(spc P<sub>xyl</sub>-noc-yfp)</i>                                                                                                              | This work                       |
| SU834  | 168 <i>trpC2<sup>+</sup> dna-1 Δnoc::cat Δspo0J::kan amyE::(spc P<sub>xyl</sub>-noc-yfp)</i>                                                                                            | This work                       |
| SU835  | 168 <i>trpC2 Δnoc::cat Δsoj-spo0J::tet amyE::(spc P<sub>xyl</sub>-ftsZ-yfp)</i>                                                                                                         | This work                       |
| SU836  | 168 <i>trpC2<sup>+</sup> dna-1 Δnoc::cat Δsoj-spo0J::tet amyE::(spc P<sub>xyl</sub>-ftsZ-yfp)</i>                                                                                       | This work                       |
| SU849  | <i>smc-ssrA loxP (kan), lacA::PxylA Ec sspB loxP (erm)</i>                                                                                                                              | Wang <i>et al.</i> 2014a        |
| SU850  | 168 <i>trpC2 smc-ssrA loxP (kan), lacA::PxylA Ec sspB loxP (erm)</i>                                                                                                                    | This work                       |
| SU851  | 168 <i>trpC2<sup>+</sup> dna-1 smc-ssrA loxP (kan), lacA::PxylA Ec sspB loxP (erm)</i>                                                                                                  | This work                       |
| SU874  | 168 <i>trpC2 Δnoc::cat, smc-ssrA loxP (kan), lacA::PxylA Ec sspB loxP (erm)</i>                                                                                                         | This work                       |
| SU875  | 168 <i>trpC2<sup>+</sup> dna-1 Δnoc::cat, smc-ssrA loxP (kan), lacA::PxylA Ec sspB loxP (erm)</i>                                                                                       | This work                       |
| SU876  | 168 <i>trpC2 Δsoj-spo0J::tet, smc-ssrA loxP (kan), lacA::PxylA Ec sspB loxP (erm)</i>                                                                                                   | This work                       |
| SU877  | 168 <i>trpC2<sup>+</sup> dna-1 Δsoj-spo0J::tet, smc-ssrA loxP (kan), lacA::PxylA Ec sspB loxP (erm)</i>                                                                                 | This work                       |
| SU878  | 168 <i>trpC2 Δnoc::cat, Δsoj-spo0J::tet, smc-ssrA loxP (kan), lacA::PxylA Ec sspB loxP (erm)</i>                                                                                        | This work                       |
| SU879  | 168 <i>trpC2<sup>+</sup> dna-1 Δnoc::cat, Δsoj-spo0J::tet, smc-ssrA loxP (kan), lacA::PxylA Ec sspB loxP (erm)</i>                                                                      | This work                       |
| SU887  | 168 <i>trpC2 amyE::Pspachy-ftsZ (cat) Δspo0J::kan</i>                                                                                                                                   | This work                       |
| SU888  | 168 <i>trpC2 amyE::Pspachy-ftsZ (cat) Δnoc::tet</i>                                                                                                                                     | This work                       |
| SU889  | 168 <i>trpC2 amyE::Pspachy-ftsZ (cat) Δspo0J::kan Δnoc::tet</i>                                                                                                                         | This work                       |
| SU890  | 168 <i>trpC2 amyE::(spc P<sub>xyl</sub>-ftsZ-yfp) Δspo0J::kan</i>                                                                                                                       | This work                       |
| SU891  | 168 <i>trpC2 amyE::(spc P<sub>xyl</sub>-ftsZ-yfp) Δnoc::cat</i>                                                                                                                         | This work                       |
| SU892  | 168 <i>trpC2 amyE::(spc P<sub>xyl</sub>-ftsZ-yfp) Δspo0J::kan Δnoc::cat</i>                                                                                                             | This work                       |
| SU893  | 168 <i>trpC2 amyE::(spc P<sub>xyl</sub>-ftsZ-yfp) Δspo0J::kan ΔminCD::cat</i>                                                                                                           | This work                       |
| SU894  | <i>yuxG(-87°)::lacO48 (phleo), yhdG(+87°)::tetO48 (cat), ycgO::P<sub>ftsW</sub> tetR-cfp (spec) terminators P<sub>ftsW</sub> lacI-mypet</i>                                             | Wang <i>et al.</i> 2014a        |
| SU895  | 168 <i>trpC2<sup>+</sup> dna-1 yuxG(-87°)::lacO48 (phleo), yhdG(+87°)::tetO48 (cat), ycgO::P<sub>ftsW</sub> tetR-cfp (spec) terminators P<sub>ftsW</sub> lacI-mypet</i>                 | This work                       |
| SU897  | 168 <i>trpC2<sup>+</sup> dna-1 soj-spo0J::tet, yuxG(-87°)::lacO48 (phleo), yhdG(+87°)::tetO48 (cat), ycgO::P<sub>ftsW</sub> tetR-cfp (spec) terminators P<sub>ftsW</sub> lacI-mypet</i> | This work                       |
| SU899  | 168 <i>trpC2<sup>+</sup> dna-1 Δspo0J::kan, ycgO::spo0J (erm)</i>                                                                                                                       | This work                       |
| SU901  | 168 <i>trpC2<sup>+</sup> dna-1 Δnoc::cat Δspo0J::kan, ycgO::spo0J (erm)</i>                                                                                                             | This work                       |
| SU903  | 168 <i>trpC2<sup>+</sup> dna-1 Δsoj-spo0J::tet, ycgO::spo0J (erm)</i>                                                                                                                   | This work                       |
| SU905  | 168 <i>trpC2<sup>+</sup> dna-1 Δnoc::cat Δsoj-spo0J::tet, ycgO::spo0J (erm)</i>                                                                                                         | This work                       |

1 **Table S2: Plasmids and oligonucleotides used in this study**

2

| Plasmid          | Description                                                    | Source    |
|------------------|----------------------------------------------------------------|-----------|
| pKM084           | <i>ycgO::cat</i>                                               | D. Rudner |
| pIH003           | <i>ycgO::Psoj-optRBS-spo0J (erm)</i>                           | This work |
| Oligonucleotides | Sequence <sup>a</sup>                                          | Source    |
| olH004           | cgc <b>GAATTC</b> AAACCATTTTCTCACCATCCTG                       | This work |
| olH005           | cgc <b>GCTAGC</b> CTTTCACATGAACATGTAATC                        | This work |
| olH008           | cgc <b>GCTAGC</b> ACATAAGGAGGAACTACTATGGCtaaAGGCCTTGAAAAAGGGAT | This work |
| olH0010          | gcg <b>GGATCC</b> TTATGATTCTCGTTCAGACA                         | This work |

3 <sup>a</sup> Bold letters indicate the recognition sequence for restriction enzymes

4

5 **Plasmid construction**

6

7 **pIH003** [*ycgO::Psoj-optRBS-spo0J (erm)*] was generated by a two-way ligation of a  
 8 EcoRI-NheI PCR product containing the promoter region for the *soj-spo0J* operon  
 9 (amplified with oligonucleotide primers olH004 and olH005), and a NheI-BamHI PCR  
 10 product containing the *spo0J* gene (amplified with oligonucleotide primers olH008 and  
 11 olH0010) into pKM084 cut with EcoRI-BamHI. Both PCR products were amplified from  
 12 SU5 genomic DNA as the template. pKM084 is an ectopic integration vector for  
 13 recombination into the *ycgO* locus (David Rudner).

14

15 **SUPPLEMENTARY FIGURE LEGENDS**

16

17 **Figure S1: Z ring positioning when initiation of DNA replication is blocked in**  
 18 **vegetatively grown fixed cells.** (A-D) Vegetative cells were grown in PAB to the mid-  
 19 exponential phase at the permissive temperature (34°C), then shifted to the non-  
 20 permissive temperature (48°C) for a further 60 min: (A) wild-type; SU5, (B) *dna-1*;  
 21 SU661, (C)  $\Delta$ *soj-spo0J*; SU765 and (D) *dna-1*  $\Delta$ *soj-spo0J*; SU766. Percentages  
 22 shown are the frequencies of Z rings occurring at midcell in the range of 0.45 – 0.5 on  
 23 the x-axis.

24 **Figure S2: Z ring positioning when initiation of DNA replication is blocked in**  
 25 **vegetatively grown fixed cells of individual *soj* or *spo0J* mutants.** (A-F)  
 26 Vegetative cells were grown in PAB to the mid-exponential phase at the permissive  
 27 temperature (34°C), then shifted to the non-permissive temperature (48°C) for a  
 28 further 60 min: (i) wild-type; SU5, (ii) *dna-1*; SU661, (iii)  $\Delta$ *soj*; SU769, (iv) *dna-1*  $\Delta$ *soj*;  
 29 SU770, (v)  $\Delta$ *spo0J*; SU771 and, (vi) *dna-1*  $\Delta$ *spo0J*; SU772. Percentages shown are  
 30 the frequencies of Z rings occurring at midcell in the range of 0.45 – 0.5 on the x-axis.

1 **Figure S3: Z ring positioning in outgrown spore cells at the permissive**  
2 **temperature.** Z ring positioning was examined in outgrown spores at the permissive  
3 temperature (34°C) for 120 min in strains: (A) wild-type; SU492, (B) *dna-1*; SU746, (C)  
4 *Δsoj-spo0J*; SU767 and (D) *dna-1 Δsoj-spo0J*; SU768. Percentages shown are the  
5 frequencies of Z rings occurring at midcell in the range of 0.45 – 0.5 on the x-axis.

6 **Figure S4: Whole field of view of Z rings overlayed with DAPI and phase contrast**  
7 **when initiation of DNA replication is blocked in live outgrown spores.**  
8 Microscopic images of an overlay of phase contrast, DAPI (red) and FtsZ-YFP (green)  
9 in (A) *dna-1*; SU746, and (B) *dna-1 Δsoj-spo0J*; SU768. Right side images show closer  
10 details of selected cells with different nucleoid morphologies and varying Z ring  
11 positions. Scale bar represents 2 μm.

12 **Figure S5: Flow cytometry profiles of *Δsoj-spo0J* strains when initiation of DNA**  
13 **replication is blocked via *dna-1* mutant or addition of HPUra.** Flow cytometry  
14 profiles in controls where initiation of DNA replication is progressing normally (wild-  
15 type; SU492 and *Δsoj-spo0J*; SU767) or blocked (controls: *dna-1*; SU746 and wild-  
16 type +HPUra; and test strains: *dna-1 Δsoj-spo0J*; SU768 and *Δsoj-spo0J* +HPUra. n  
17 = 10,000.

18 **Figure S6: Noc localisation in the absence of *spo0J* when initiation of DNA**  
19 **replication is blocked.** Strains (A) wild type; SU831, (B) *dna-1*; SU832, (C) *Δspo0J*  
20 *Δnoc*; SU833, and (D) *dna-1 Δspo0J Δnoc*; SU834, possessing Noc tagged with a  
21 yellow fluorescent protein (*noc-yfp*; falsely coloured cyan) were grown vegetatively  
22 supplemented with 0.3% xylose. DNA stained with DAPI (falsely coloured red). Scale  
23 bar = 2 μm.

24 **Figure S7: Z ring positioning when initiation of DNA replication is blocked**  
25 **during spore outgrowth.** Z ring positioning was examined in two conditions: in the  
26 temperature-sensitive *dna-1* background (A) and with the addition of the DNA  
27 polymerase III inhibitor HPUra (B), in spore outgrown spore cells. A: (i) wild-type;  
28 SU492, (ii) *dna-1*; SU746, (iii) *Δnoc*; SU831, (iv) *dna-1 Δnoc*; SU832, (v) *Δsoj-spo0J*  
29 *Δnoc*; SU835, and (vi) *dna-1 Δsoj-spo0J Δnoc*; SU836; B: (i) wild-type +HPUra and  
30 (ii) *Δsoj-spo0J Δnoc* +HPUra.

31 **Figure S8: Z ring positioning in the individual mutants, *soj* or *spo0J*, in the *dna-***  
32 **1 *Δnoc* mutant at the non-permissive temperature.** Scatter plots showing Z ring

1 positioning and average cell length of vegetatively grown, fixed cells of (A) wild-type;  
2 SU5, (B) *dna-1*; SU661, (C)  $\Delta$ *soj*  $\Delta$ *noc*; SU829, (D) *dna-1*  $\Delta$ *soj*  $\Delta$ *noc*; SU830, (E)  
3  $\Delta$ *spo0J*  $\Delta$ *noc*; SU827, and (F) *dna-1*  $\Delta$ *spo0J*  $\Delta$ *noc*; SU828.

4 **Fig S9. Complementation of *spo0J* in the temperature sensitive strains.** (A) Z ring  
5 positioning, and (B) nucleoid morphologies in strains (i) *dna-1 spo0J ycg::spo0J*  
6 (SU899), (ii) *dna-1 spo0J noc ycg::spo0J* (SU901), (iii) *dna-1 soj-spo0J ycg::spo0J*  
7 (SU903), and (iv) *dna-1 soj-spo0J noc ycg::spo0J* (SU905), grown vegetatively at the  
8 non-permissive temperature and examined via IFM and ethanol fixation, respectively.  
9 n = 200.

10 **Figure S10: Z ring positioning when initiation of DNA replication is blocked**  
11 **during spore outgrowth in the *dna-1* temperature-sensitive SMC-depleted**  
12 **mutant.** Scatter plots showing Z ring positioning and average cell length of outgrown  
13 spores grown in the presence of xylose (1% v/v) to induce SMC degradation in  
14 replicating cells (left column) and non-replicating cells (*dna-1* mutant; right column). Z  
15 ring positioning was examined in strains (A) wild-type; SU850, (B) *dna-1*; SU851, (C)  
16  $\Delta$ *noc*; SU874, (D) *dna-1*  $\Delta$ *noc*; SU875, (E)  $\Delta$ *soj-spo0J*; SU876, (F) *dna-1*  $\Delta$ *soj-spo0J*;  
17 SU877, (G)  $\Delta$ *noc*  $\Delta$ *soj-spo0J*; SU878, and (H) *dna-1*  $\Delta$ *noc*  $\Delta$ *soj-spo0J*; SU879.

18 **Figure S11: Cell division is not inhibited in a *minCD spo0J* double mutant.** Phase  
19 contrast images of mid-exponentially growing cells of strains (A) wild-type; SU492, (B)  
20  $\Delta$ *spo0J*; SU890, (C)  $\Delta$ *minCD*; SU682 and (D)  $\Delta$ *spo0J*  $\Delta$ *minCD*; SU893 grown at 30°C  
21 and 37°C. Scale bar represents 2  $\mu$ m.

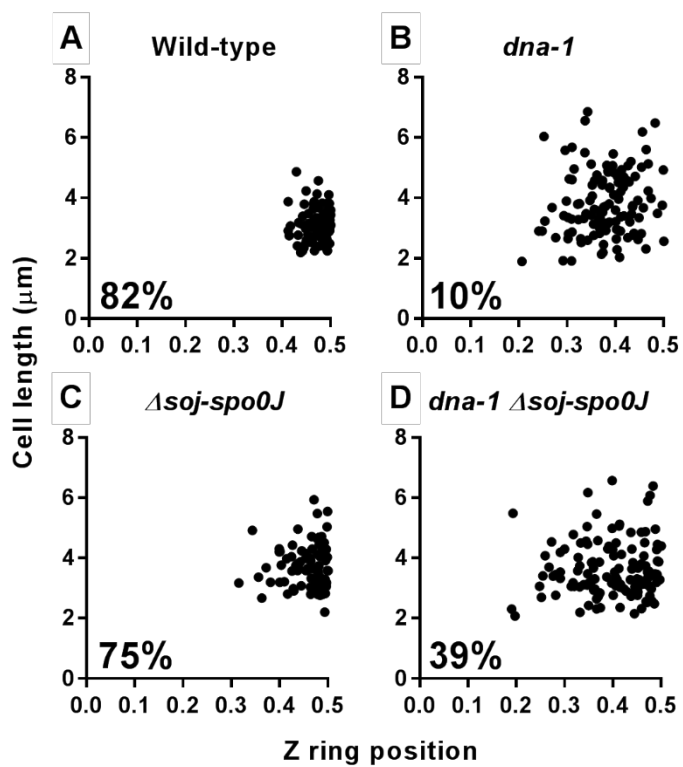

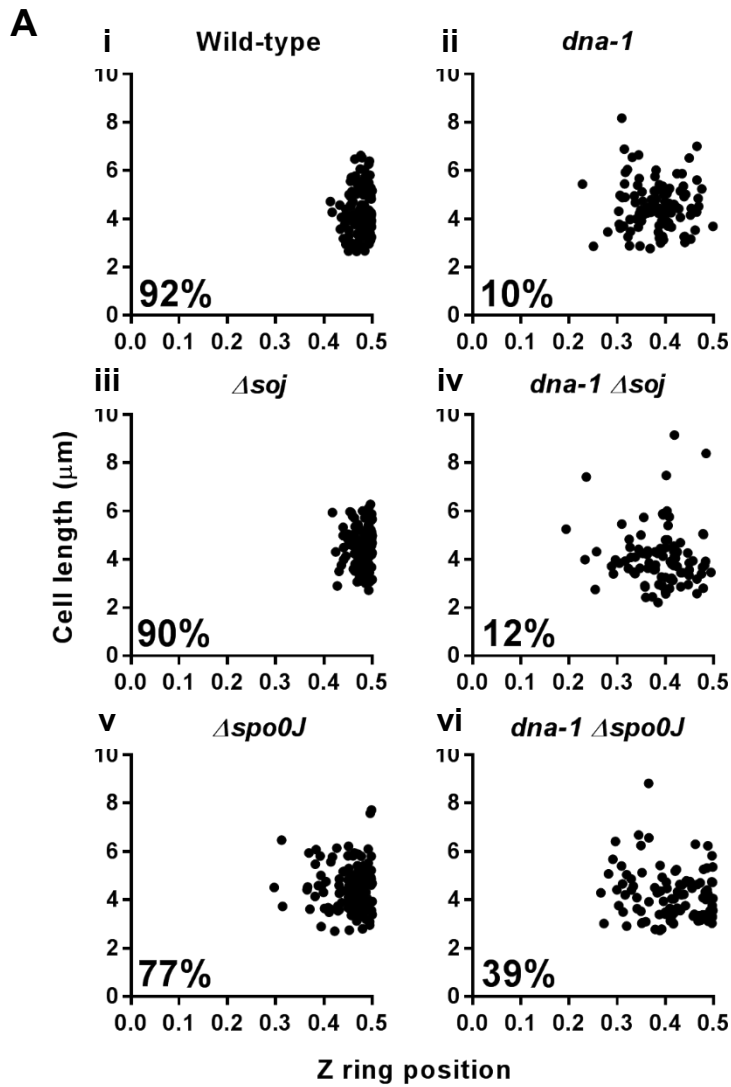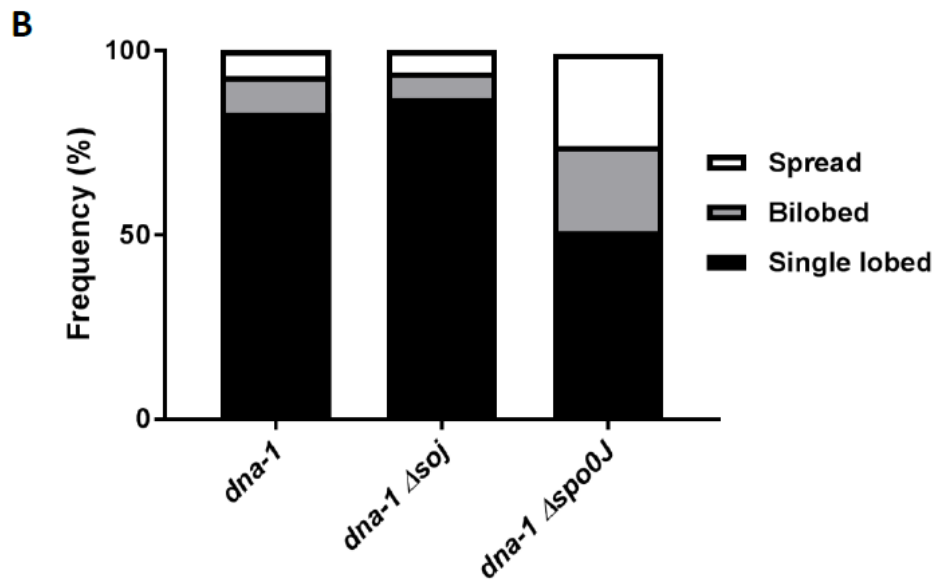

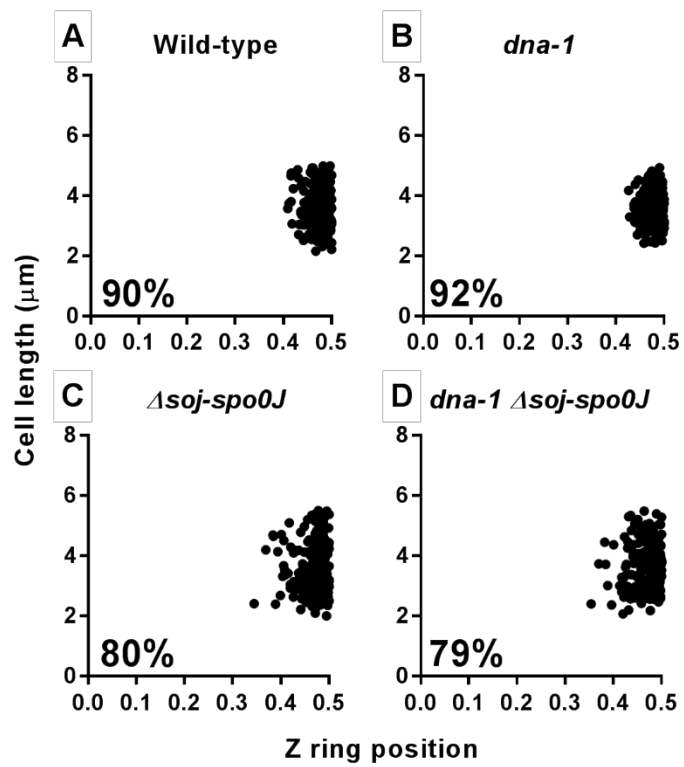



**A** *dna-1*

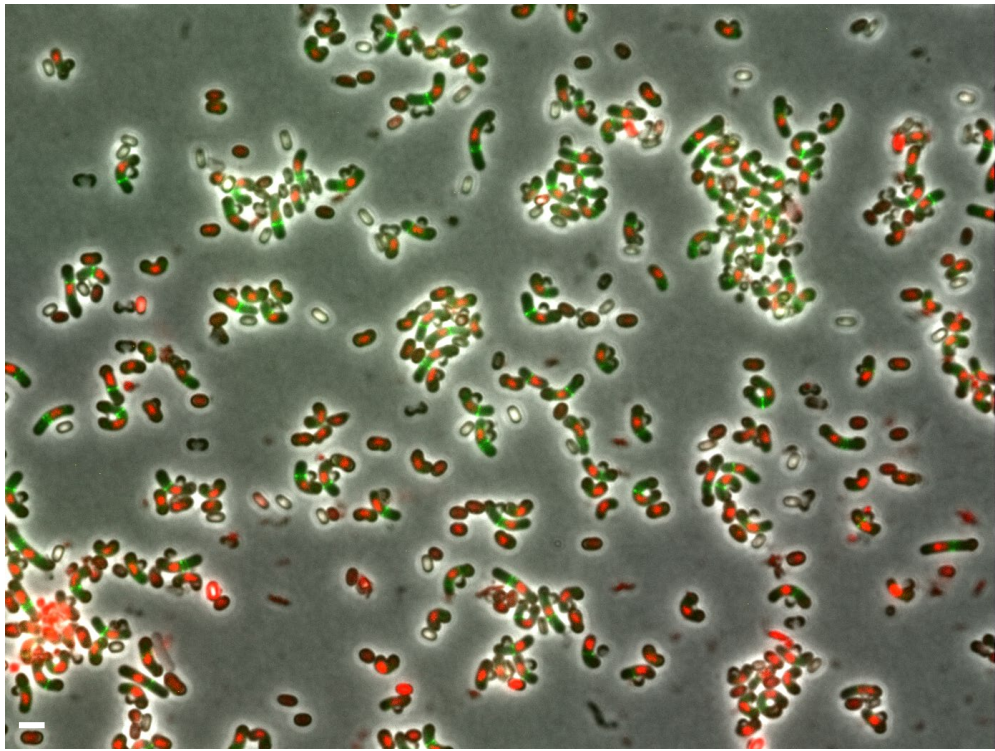

**B** *dna-1 Δsoj-spo0J*

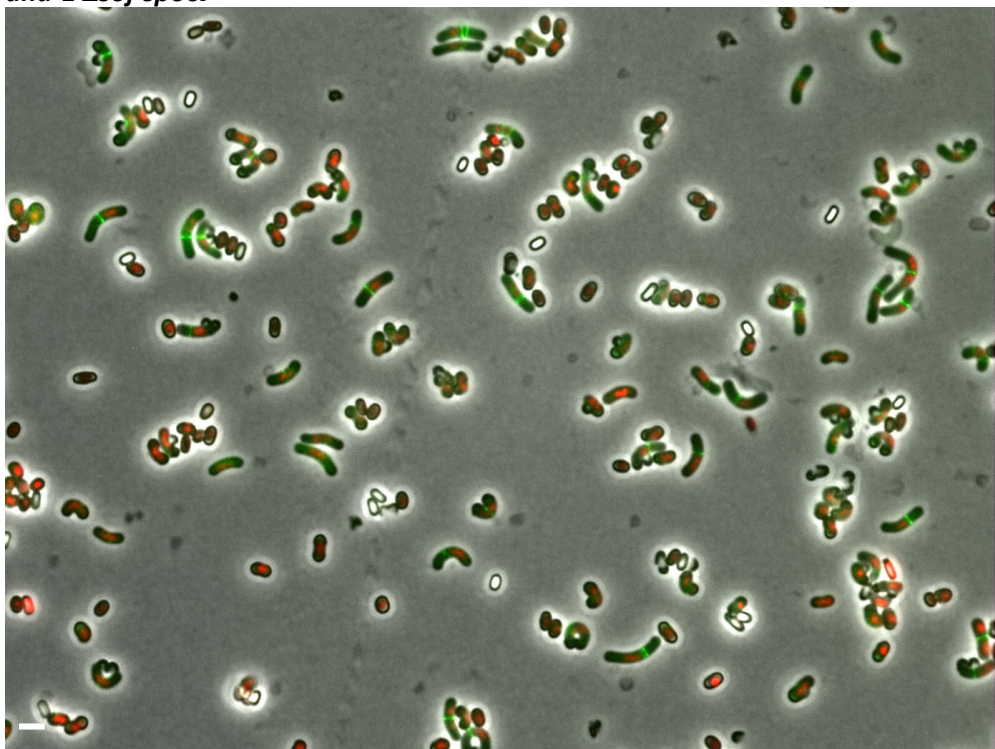

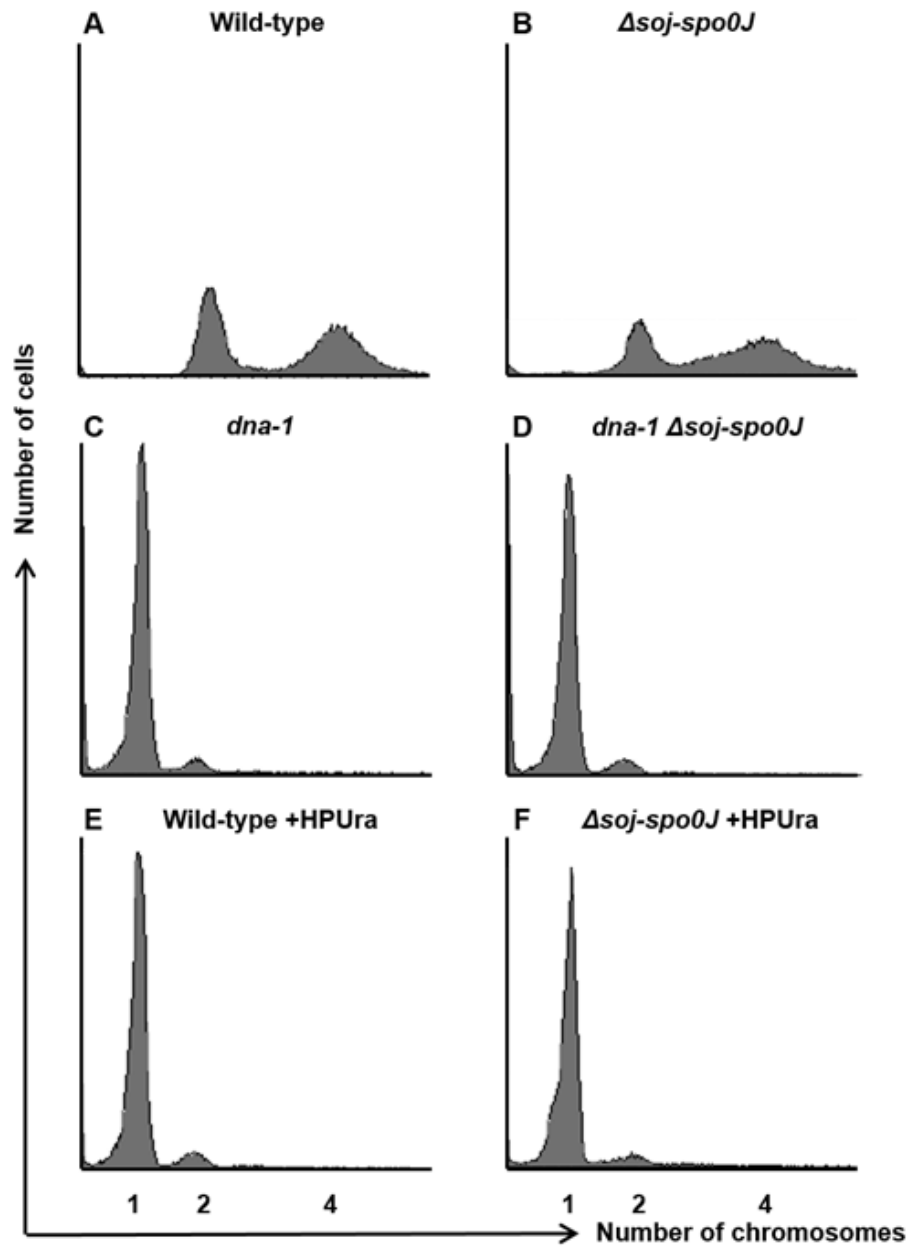

**A Wild-type**

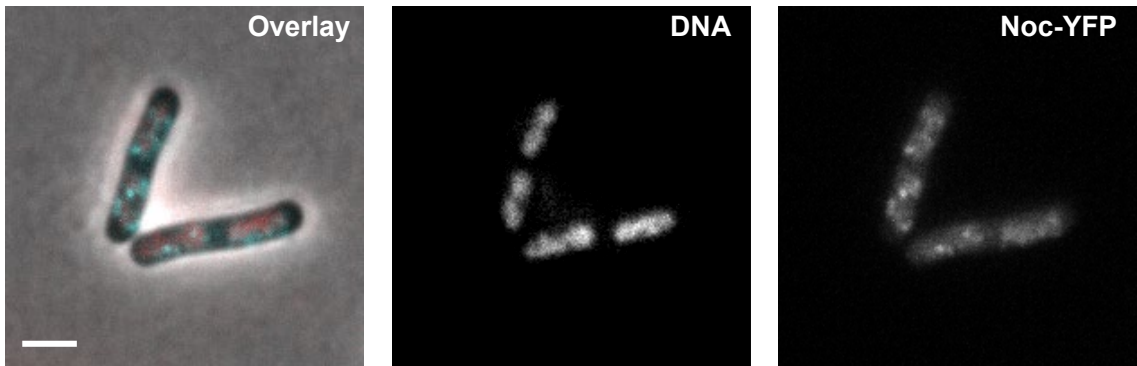

**B *dna-1***

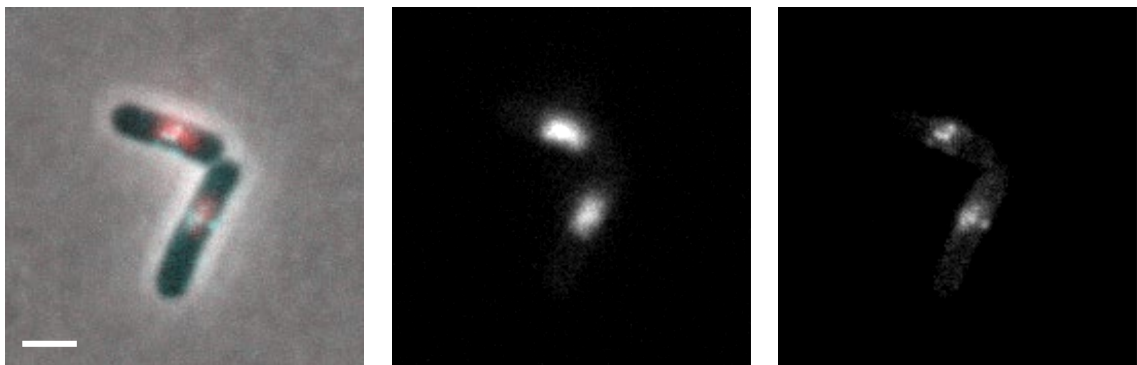

**C  $\Delta spo0J$**

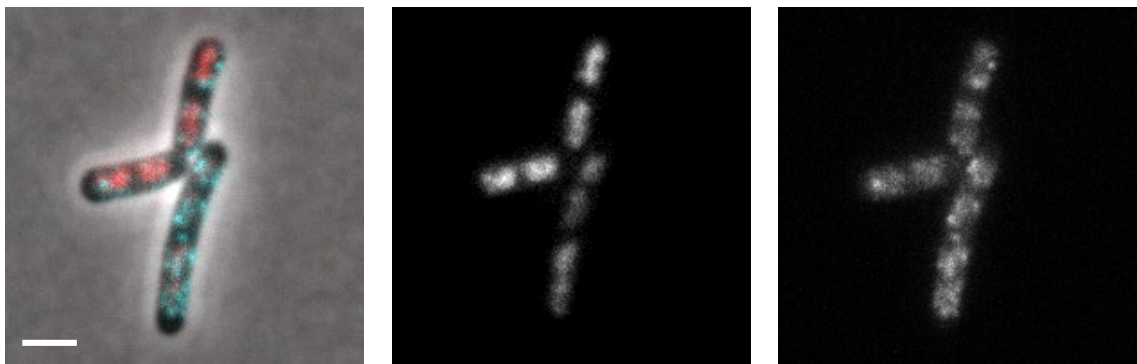

**D *dna-1*  $\Delta spo0J$**

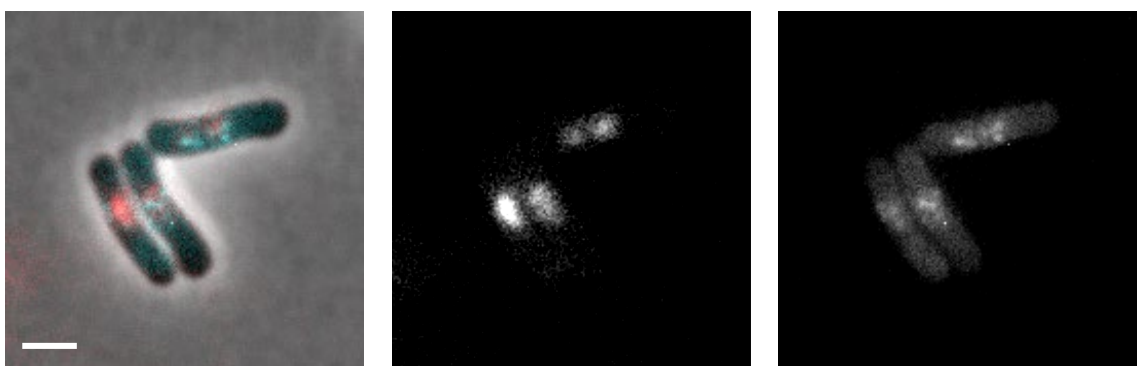

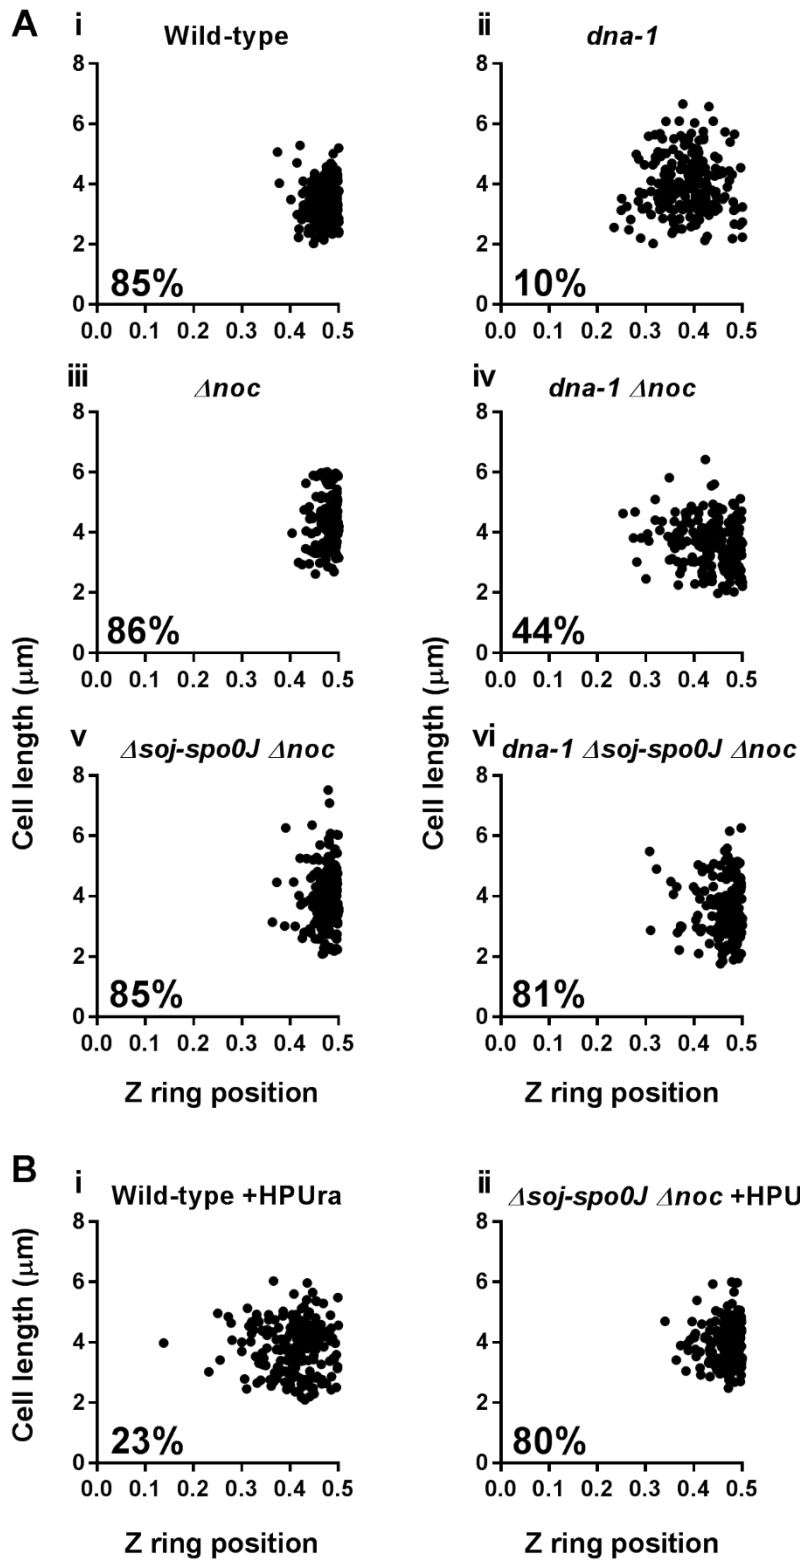

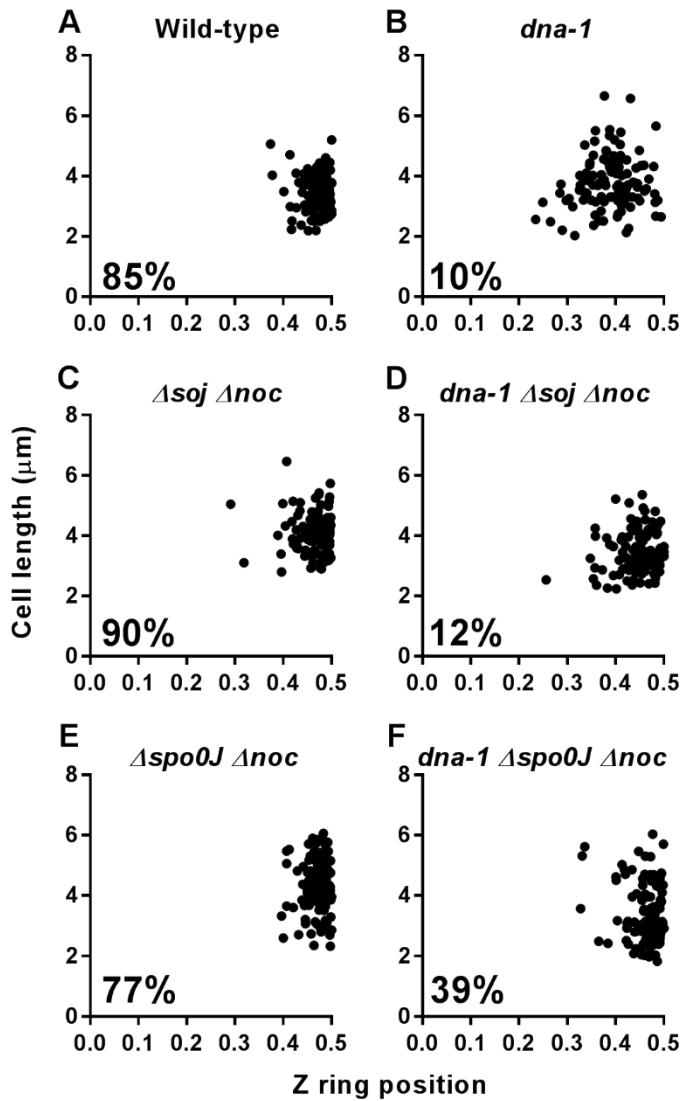

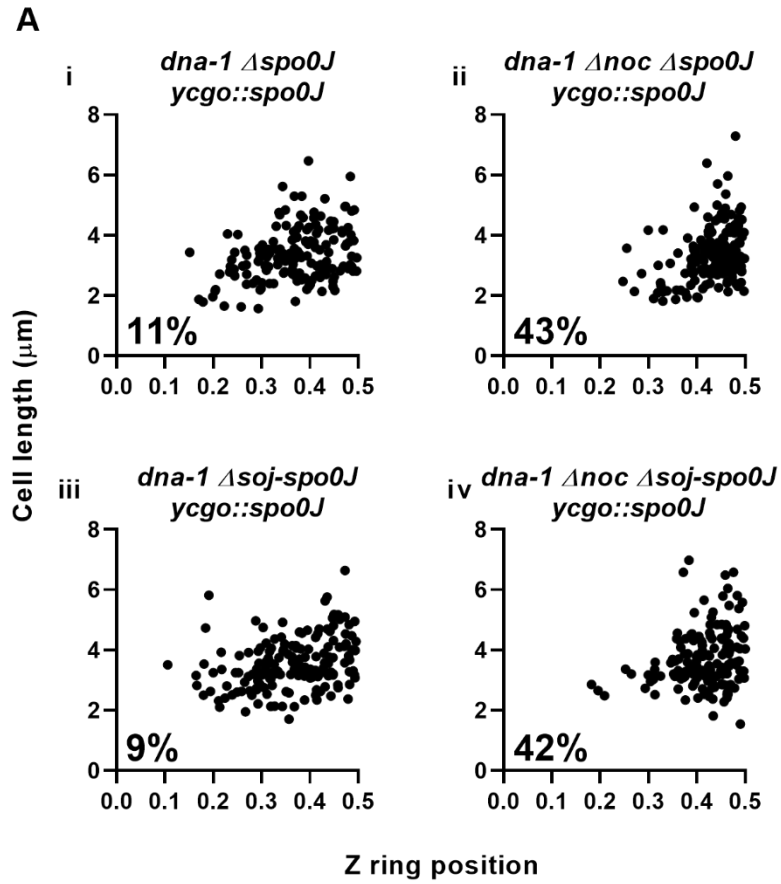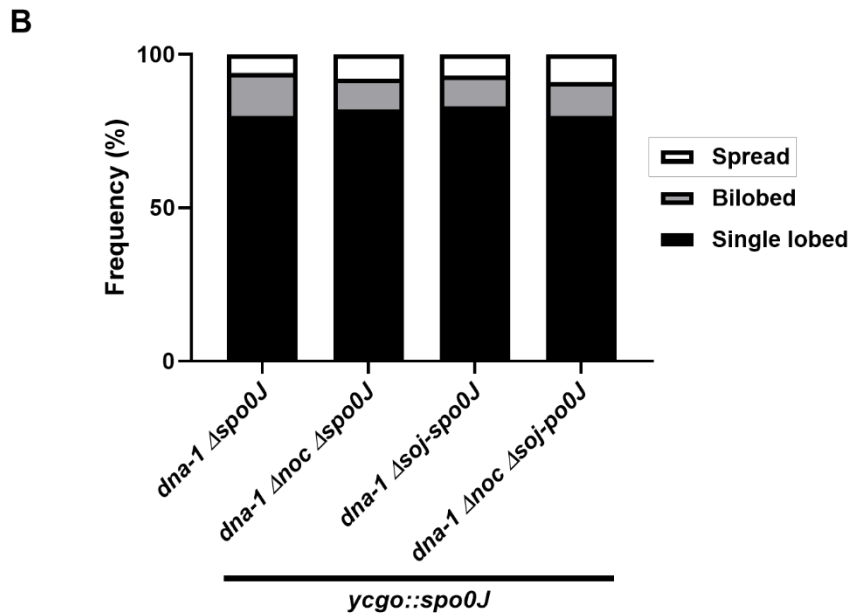

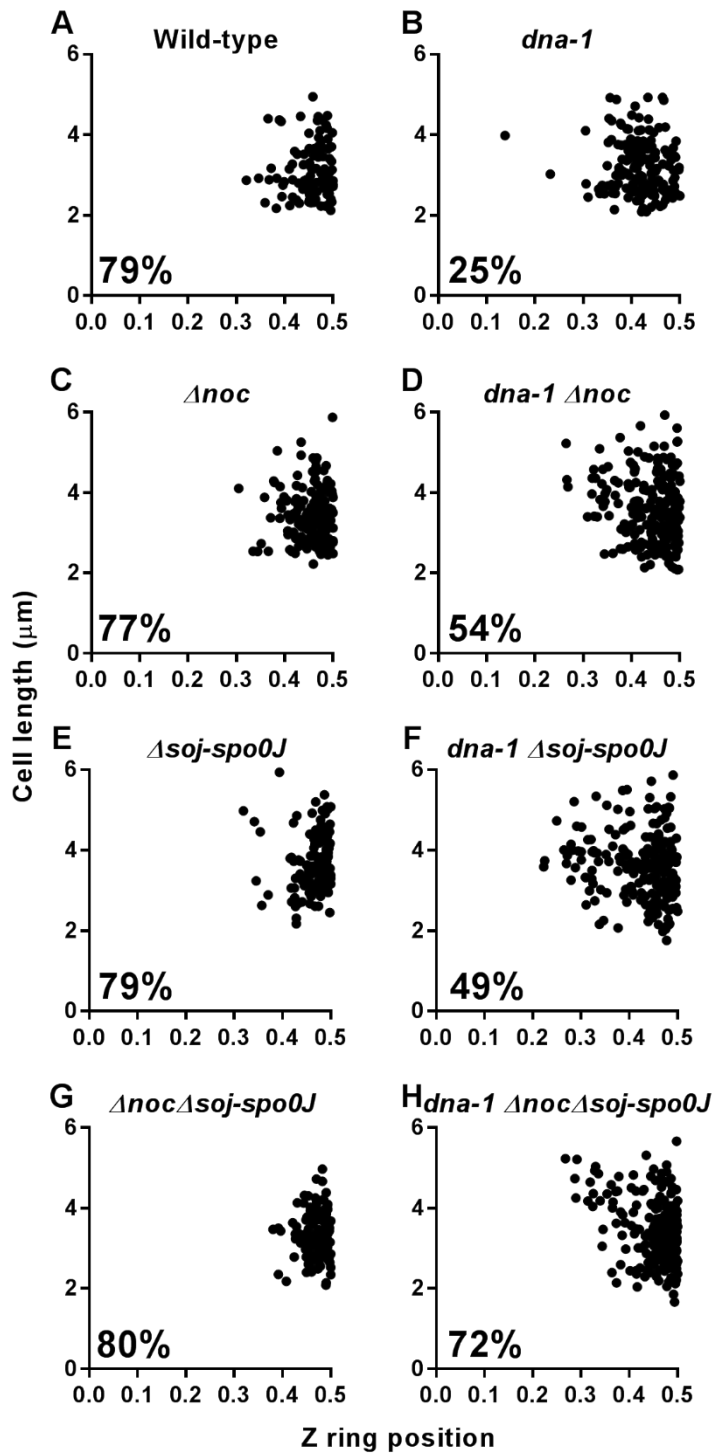

**A Wild-type**

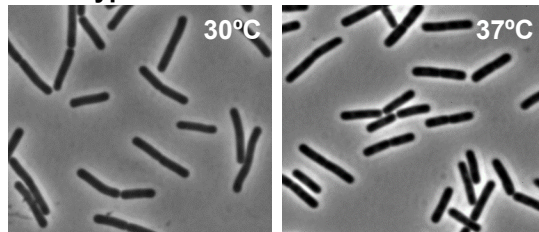

**B  $\Delta spo0J$**

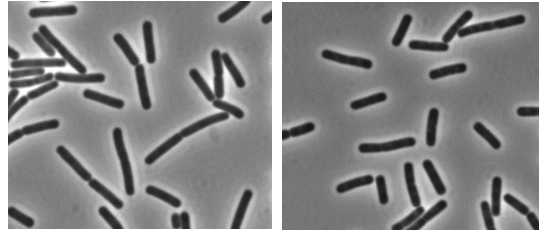

**C  $\Delta minCD$**

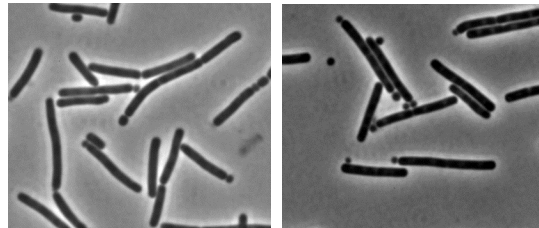

**D  $\Delta spo0J \Delta minCD$**

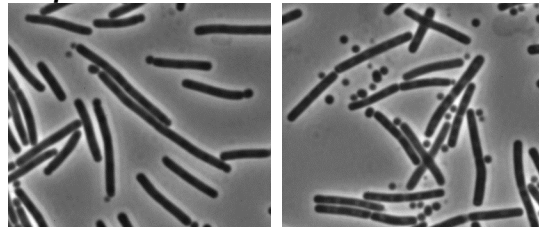

Supplement: MMI-112-766-s001.pdf [file MMI-112-766-s001.pdf]
